# Supplementary material
Source: publisher site journal article supplement (https://www.dovepress.com/article/609242)
Supplement: Supplementary file 1 [file 609242%20Supplemental%20File.docx]

**Supplemental File**: Literature review full search strategies

CINAHL with Full Text via EBSCO(1963+)

| #4 | S1 AND S2 AND S3 Limited to English |
| --- | --- |
| #3 | MH "Peer Group" OR MH "Peer Counseling" OR XB ((peer* adj2 (recovery or support or led or lead* or navigat* or coach* or group* or counsel*)) or peers or CPRSS* or PRSS* or PRC) |
| #2 | MH "Substance Use Disorders+" OR XB(alcohol* or drink* or binge* or ((drug* or chemical* or substance*) N2 (dependen* or abus* or addict* or "use" or misuse or illicit)) or amphetamine* or meth or cocaine or inhalant* or overdos* or over-dos* or marijuana or cannabi* or narcotic* or opioid*) OR SO(alcohol* or drink* or binge* or drug* or chemical* or substance*) |
| #1 | MH "Emergency Service+" OR XB(((emergency or A-and-E or A-E or AE or A&E or A-&-E) N2 (department* or medicine or room* or unit* or ward*)) or urgent-care or emergicent*) OR SO(emergency) |

Cochrane Central Register of Controlled Trials (CCTR) via Ovid (1991+))

| # | Query | Results from 13 Aug 2025 |
| --- | --- | --- |
| 1 | (((emergency or A-and-E or A-E or AE or A&E or A-&-E) adj2 (department* or medicine or room* or unit* or ward*)) or urgent-care or emergicent*).ab,hw,ti. or (ED or ER).ti. | 22,839 |
| 2 | (alcohol* or drink* or binge* or ((drug* or chemical* or substance*) adj2 (dependen* or abus* or addict* or "use" or misuse or illicit)) or amphetamine* or meth or cocaine or inhalant* or overdos* or over-dos* or marijuana or cannabi* or narcotic* or opioid*).ab,hw,ti,jw. | 124,106 |
| 3 | ((peer* adj2 (recovery or support or led or lead* or navigat* or coach* or group* or counsel*)) or peers or CPRSS* or PRSS* or PRC).ab,hw,ti. | 9,325 |
| 4 | 1 and 2 and 3 | 59 |
| 5 | limit 4 to english language | 59 |

Embase via Ovid (1974+)

| # | Query | Results from 13 Aug 2025 |
| --- | --- | --- |
| 1 | emergency ward/ or hospital emergency service/ or emergency physician/ or emergency medicine/ or (((emergency or A-and-E or A-E or AE or A&E or A-&-E) adj2 (department* or medicine or room* or unit* or ward*)) or urgent-care or emergicent*).ab,kf,ti,jx. or (ED or ER).ti. | 485,937 |
| 2 | exp substance abuse/ or exp drug dependence/ or (alcohol* or drink* or binge* or ((drug* or chemical* or substance*) adj2 (dependen* or abus* or addict* or "use" or misuse or illicit)) or amphetamine* or meth or cocaine or inhalant* or overdos* or over-dos* or marijuana or cannabi* or narcotic* or opioid*).ab,kf,ti,jw. | 1,500,891 |
| 3 | peer counseling/ or peer group/ or social support/ or ((peer* adj2 (recovery or support or led or lead* or navigat* or coach* or group* or counsel*)) or peers or CPRSS* or PRSS* or PRC).ab,kf,ti. | 236,473 |
| 4 | 1 and 2 and 3 | 655 |
| 5 | limit 4 to english language | 653 |

MEDLINE via Ovid (1946+ and Epub Ahead of Print, In-Process & Other Non-Indexed Citations and Ovid MEDLINE(R) Daily)

| # | Query | Results from 13 Aug 2025 |
| --- | --- | --- |
| 1 | Emergency Service, Hospital/ or Emergency Medicine/ or (((emergency or A-and-E or A-E or AE or A&E or A-&-E) adj2 (department* or medicine or room* or unit* or ward*)) or urgent-care or emergicent*).ab,kf,ti,jw. or (ED or ER).ti. | 289,398 |
| 2 | exp Substance-Related Disorders/ or (alcohol* or drink* or binge* or ((drug* or chemical* or substance*) adj2 (dependen* or abus* or addict* or "use" or misuse or illicit)) or amphetamine* or meth or cocaine or inhalant* or overdos* or over-dos* or marijuana or cannabi* or narcotic* or opioid*).ab,kf,ti,jw. | 1,110,819 |
| 3 | peer group/ or Social Support/ or ((peer* adj2 (recovery or support or led or lead* or navigat* or coach* or group* or counsel*)) or peers or CPRSS* or PRSS* or PRC).ab,kf,ti. | 163,635 |
| 4 | 1 and 2 and 3 | 267 |
| 5 | limit 4 to english language | 267 |

PsycINFO via Ovid(1806+)

| # | Query | Results from 13 Aug 2025 |
| --- | --- | --- |
| 1 | emergency services/ or emergency medicine/ or (((emergency or A-and-E or A-E or AE or A&E or A-&-E) adj2 (department* or medicine or room* or unit* or ward*)) or urgent-care or emergicent*).ab,id,ti,jx. or (ED or ER).ti. | 26,779 |
| 2 | exp "substance use disorder"/ or exp drug addiction/ or drug overdoses/ or exp intravenous drug usage/ or prescription drug misuse/ or exp "substance use treatment"/ or exp alcohol treatment/ or (alcohol* or drink* or binge* or ((drug* or chemical* or substance*) adj2 (dependen* or abus* or addict* or "use" or misuse or illicit)) or amphetamine* or meth or cocaine or inhalant* or overdos* or over-dos* or marijuana or cannabi* or narcotic* or opioid*).ab,id,ti,jx. | 369,355 |
| 3 | exp Peers/ or peer support/ or exp Peer Relations/ or social support/ or ((peer* adj2 (recovery or support or led or lead* or navigat* or coach* or group* or counsel*)) or peers or CPRSS* or PRSS* or PRC).ab,id,ti. | 145,072 |
| 4 | 1 and 2 and 3 | 117 |
| 5 | limit 4 to english language | 114 |

Web of Science Core Collection via Clarivate Analytics(Science Citation Index Expanded1975+& Emerging Sources Citation Index2015+)

| #4 | #1 AND #2 AND #3 and Preprint Citation Index (Exclude – Database) and English (Languages) |
| --- | --- |
| #3 | peer* NEAR/2 (recovery or support or led or lead* or navigat* or coach* or group* or counsel*) (Topic) or peers or CPRSS* or PRSS* or PRC (Topic) and Preprint Citation Index (Exclude – Database) |
| #2 | (drug* or chemical* or substance*) NEAR/2 (dependen* or abus* or addict* or "use" or misuse or illicit) (Topic) or alcohol* or drink* or binge* or amphetamine* or meth or cocaine or inhalant* or overdos* or over-dos* or marijuana or cannabi* or narcotic* or opioid* (Topic) or alcohol* or drink* or binge* or drug* or chemical* or substance* (Publication/Source Titles) and Preprint Citation Index (Exclude – Database) |
| #1 | (emergency or A-and-E or A-E or AE or A&E or A-&-E) NEAR/2 (department* or medicine or room* or unit* or ward*) (Topic) or urgent-care or emergicent* (Topic) or ED or ER (Title) or emergency (Publication/Source Titles) and Preprint Citation Index (Exclude – Database) |
